## **Non-random mating and information theory**

A. Carvajal-Rodríguez

Departamento de Bioquímica, Genética e Inmunología. Universidad de Vigo, 36310  
Vigo, Spain.

\*: A. Carvajal-Rodríguez. Departamento de Bioquímica, Genética e Inmunología.

Universidad de Vigo, 36310 Vigo, Spain. Phone: +34 986813828

*email:* [acraaj@uvigo.es](mailto:acraaj@uvigo.es)

**Keywords:** Mate choice, sexual selection, sexual isolation, information theory,  
Kullback-Leibler divergence, population genetics.

## *Abstract*

1 In this work, mate choice is modeled by means of the abstract concept of mating  
2 propensity. This only assumes that different type of couples can have different mating  
3 success. Thus, the model is adequate for any population where mating among distinct  
4 types is occurring. There is no extra assumption about particular mating scheme or  
5 preference model. It is shown that the concept of mating propensity permits to express  
6 the observed change in the mating frequencies as the gain in information with respect to  
7 random mating. This information framework provides the connection between mate  
8 choice and the exact mathematical partition of the choice effects. Namely sexual  
9 isolation, sexual selection and a mixed effect. The sexual selection component is the  
10 sum of the intrasexual male and female selection. Interestingly, the information partition  
11 is composed of log-likelihood ratios providing a baseline for defining adequate null  
12 hypotheses for the distinct aspects of the mate choice problem. The utility of the  
13 proposed framework is shown by analyzing real data to compare previous estimates of  
14 intra and intersexual effects. On the other hand, some toy-models are also studied  
15 showing how different mating schemes (e.g. by similarity or by preference-display)  
16 correspond to different proportions of intra- and intersexual selection information. We  
17 outline that when the effect of the phenotype onto the mating propensity is  
18 multiplicative the intersexual selection effects cannot appear. Thus, sexual isolation  
19 occurs as a deviation from multiplicativity in the phenotypic or trait effects over mate  
20 choice. The preference-display models are also easily interpreted in terms of  
21 information and we have inspected models of full isolation, full intrasexual selection  
22 and mixed effect models. It is concluded that the new framework permits testing the  
23 different choice effects. Additionally, it provides a new setting for exploring different  
24 mating models and their consequences.

## 25 *Introduction*

26 Mate choice is arguably one of the most active areas of evolutionary research. There has  
27 been a bunch of controversy regarding this concept in part because is a significant  
28 element for fields so diverse as population genetics, evolutionary-ecology, animal  
29 behavior, sociology, or psychology. By other side, there has been an excess of verbal  
30 models and imprecise terminology regarding different aspects of mate choice (Edward,  
31 2015). Mate choice can be broadly described as the effect of some expressed traits  
32 leading to non-random mating. Under this broad definition there are various aspects of  
33 mate choice that can be considered. Yet Darwin (1871) distinguishes between  
34 intrasexual selection and intersexual selection. The first arises directly from competition  
35 among individuals of the same sex while the second arises from choice of mates by the  
36 other sex (Kuijper et al., 2012). Alternatively, from a genetics population point of view,  
37 mate choice is defined as the observed mating frequency deviation with respect to  
38 random mating considering the population gene or phenotype frequencies. So defined,  
39 mate choice can be partitioned into (intra)sexual selection, defined as the observed  
40 change in gene or phenotype frequencies in mated individuals with respect to  
41 population frequencies, and sexual isolation (behavioral isolation or intersexual  
42 selection), which is the deviation from random mating in mated individuals (Rolán-  
43 Alvarez and Caballero, 2000). In this work I follow these definitions of mate choice,  
44 intrasexual and intersexual selection.

45 The many aspects and complexity of mate choice justifies the extensive research that  
46 has been made in the last decades producing several theoretical models and empirical  
47 tests. Unfortunately, little effort has been made to discuss different theoretical models in

48 the light of the observations, and the empirical tests have been rarely interpreted from  
49 the modeling side (Roff, 2015).

50 A related problem is the question about the adequate null hypothesis to confront the  
51 evolution of mate choice. The Lande-Kirpatrick (L-K) model has been proposed as a  
52 null model (Kirkpatrick, 1982; Lande, 1981; Prum, 2010; Roff and Fairbairn, 2014).  
53 This model assumes neutral genetic variation for the preference but the target trait can  
54 be under natural selection. Hence, L-K fails as a null model when the preference is by  
55 similarity (preference and target trait coincide) and the target trait is "magic" sensu  
56 Gavrilets (2004) because in this case the preference trait is already under selection  
57 (Hughes, 2015).

58 Therefore, there is a need for both null models and a general framework where the key  
59 essential facts of the mate choice can be adequately described. Here, I argue that the  
60 formalism provided by the information theory is the right tool to do so.

61 The information theory has been already elegantly applied for describing evolutionary  
62 change (Frank, 2009; Frank, 2012; Frank, 2013). The present work takes advantage of  
63 that mathematical structure and applies it for modeling the change in mating frequencies  
64 due to mate choice. As far as I know there is not a previous attempt of describing mate  
65 choice from the point of view of the information theory. Although the potential of the  
66 informational view for evolutionary ecology has been already suggested (Dall et al.,  
67 2005).

68 I begin with the definition of a general model that only requires an abstract functional  
69 relationship connecting the observed mating frequencies with the expected by random  
70 mating from the population gene or phenotype frequencies. This suffices for developing  
71 a general information equation for mate choice that can be adequately partitioned into

72 intrasexual and intersexual information components plus a mixed term provoked by the  
73 confounding effect of the marginal frequencies when the propensity effects are  
74 asymmetric. Interestingly, the three terms can be separately estimated from the observed  
75 frequencies and so, the researcher can study how different models and parameters  
76 translate into the different mate choice components. Also, it is proposed that this setting  
77 provides the baseline for solving the mate choice null hypothesis problem since the null  
78 model emerges naturally from the idea of zero information. Thus, the correct null  
79 should not rely on neutral preference or trait genes but on zero information.

80 The utility of this framework is shown by analyzing a real data example. Additionally,  
81 some a priori defined mating functions are tested to explore the importance that the  
82 implementation of different mating preferences can have on the intra- and intersexual  
83 selection partition. A deeper study on the outcomes of different forms of the mating  
84 preference functions is out of the scope of the present article and is left for future work.

85

### 86 *Model of Mate Choice*

87 As mentioned above, the following model is as a particular specification of the  
88 information theory interpretation for evolutionary models, proposed in (Frank, 2012;  
89 Frank, 2013). The general framework developed by this author fits perfectly for the  
90 purpose of describing the occurrence of non-random mating and the flow of information  
91 that it provokes. Remarkably, once the basic equation for the gain in information due to  
92 non-random mating is formalized, the relationship between mate choice and its different  
93 evolutionary outcomes emerges naturally, providing a clear and useful picture of the  
94 intrasexual and intersexual selection effects.

95

96 **GENERAL MODEL**

97 Let consider a population with a number of  $n_1$  females and  $n_2$  males. For a given female  
98 phenotype  $X$  with  $K$  different classes having values  $X_1, X_2 \dots X_k$ , the frequency of the  
99 phenotype  $X_i$  in the female population is  $p_{1i} = n_{1X_i} / n_1$ , i.e. the number of females with  
100 that phenotypic value divided by the total number of females. Similarly for the male  
101 phenotype  $Y$  with  $K'$  classes the frequency of  $Y_j$  in the male population is  $p_{2j} = n_{2Y_j} / n_2$ .

102 In this way, using the frequency of the phenotype for each sex we compute the expected  
103 mating frequencies if mating is at random

104 
$$q_{ij} = p_{1i} \times p_{2j}.$$

105 The observed mating frequencies in a given environment  $e$  can be expressed as

106 
$$q'_{ij} = q_{ij} \frac{m_{ij}(x,y,e)}{M} \quad (1)$$

107 
$$M = \sum_{i,j} q_{ij} m_{ij}(x,y,e),$$

108 where  $m_{ij}(x,y,e)/M$  is the relative propensity linked to female phenotype  $X_i$  paired with  
109 male phenotype  $Y_j$ , for successfully mating in the environment  $e$ .

110 Therefore, the observed mating frequencies are the result of the aprioristic functions  
111  $m_{ij}(x,y,e)$  (hereafter noted as  $m_{ij}$ ) that can be any kind of composition of the preference  
112 of female  $X_i$  for male  $Y_j$ , and vice versa, in the environment  $e$ . Note that random mating  
113 is a particular case of the model in (1) when the propensities are equal for every mating  
114 pair. In general, because each  $m_{ij}$  can be composed of female and male preferences,  
115 mutual mate choice models (Bergstrom and Real, 2000) are not discarded under this  
116 setting. These propensity functions can also represent intrasexual mating propensity, or

117 indeed several kinds of functions can be defined, empirical or analytical as for example  
118 the Gaussian-like preference functions (reviewed in Carvajal-Rodriguez and Rolán-  
119 Alvarez, 2014). Moreover, the model should be able to account for functions describing  
120 more complex and general mate-choice scenarios (Kuijper et al., 2012; Roff, 2015).

121 The standardized  $m_{ij}$  functions could also be estimated a posteriori from the data. In this  
122 case they coincide with the pair total index (PTI Rolán-Alvarez and Caballero, 2000)  
123 which becomes an observed realization of the relative mating propensity for the  
124 observed phenotypes (see below).

125 Once we have the observed mating frequencies as defined in (1), the change with  
126 respect to random mating is

$$127 \quad \Delta q_{ij} = q'_{ij} - q_{ij} = q_{ij} \left( \frac{m_{ij}}{M} - 1 \right)$$

128 The mean population change for a combined phenotype  $Z = X \circ Y$  is

$$\Delta Z = \sum_{i,j} \Delta q_{ij} Z_{ij}$$

129 Because the relationship in (1) is defined by ratios is more natural to express the  
130 quantities in the logarithmic scale and so we can express  $m_{ij}$  as

$$131 \quad m_{ij} = M \frac{q'_{ij}}{q_{ij}}$$

132 which in the logarithmic scale becomes

$$133 \quad l_{ij} = \log(m_{ij}) = \log(M) + \log\left(\frac{q'_{ij}}{q_{ij}}\right)$$

134 Thus, if we take the logarithm of the propensity as the couple combined phenotype  $Z$   
135 and by noting that  $\sum \Delta q_{ij} = 0$  and that  $\log(M)$  is constant through the summatory, then we  
136 can measure the mean population change  $\Delta L$  in relative propensity as

$$137 \quad \Delta L = \sum_{i,j} \Delta q_{ij} l_{ij} = \sum_{i,j} \Delta q_{ij} \log \left( \frac{q'_{ij}}{q_{ij}} \right) = J(q', q) = J_{PTI} \quad (2)$$

138 which is the Kullback-Leibler symmetrized divergence (noted as Jeffreys in Frank,  
139 2012), that measures the gain in information when the differential mating propensity  
140 moves the population from mating frequencies  $q$  to  $q'$  or vice versa. Note that if the  
141 success is equal for every pair i.e.  $M = m_{ij} \forall i,j$  then  $q' = q$  so that  $J = 0$  which is the  
142 minimum information value since  $J$  cannot be negative.

143 From equation (1) recall that each  $m_{ij}/M$  is the ratio of the frequency of the observed  
144 types divided by the expected pair types calculated from the total frequencies. Such  
145 ratio of frequencies is, by definition, the pair total index  $PTI$  (Rolán-Alvarez and  
146 Caballero, 2000) and then the logarithmic term in  $\Delta L$  is the logarithm of  $PTI$  values.  
147 Therefore  $J(q', q)$  measures the gain in information as captured by the  $PTI$  coefficients,  
148 confronting the hypothesis of mate choice against random mating. Hereafter we note  
149 this  $J$  as  $J_{PTI}$ . Interestingly enough the Jeffreys' divergence computed as  $J_{PTI}$  (by taking  
150 the natural logarithm and multiplying by the total number of matings) can be  
151 approximated by a chi-square for the null hypothesis of random mating with  $KK'-1$   
152 degrees of freedom (Evren and Tuna, 2012).

153 The information obtained from  $J_{PTI}$  has been computed using the different propensities  
154 as classes for classifying the couples (because we equated  $\log(m)$  and  $Z$ ), when the  
155 classes are based upon the phenotypes rather than in propensities we are conveying a  
156 specific meaning for the change in frequencies. Therefore, the phenotype can be viewed



157 as other scale on which we can measure this information (Frank, 2013). Of course  
158 different kinds of phenotypes can be more or less involved in mate choice and so,  
159 different scales are more or less useful for measuring the mating choice information.

160

## 161 **RELATIVE PROPENSITY AND PHENOTYPES**

162 When we observe any mating pair  $(i,j)$  we need to identify that copula by a given  
163 characteristic since we cannot in general classify the mating by the value of the  
164 propensity function  $m_{ij}$  or by a phenotype that matches it perfectly as we did above  
165 (each phenotypic pair was perfectly differentiated by specific  $m_{ij}$  mating propensity).  
166 Therefore, we may think on different traits  $Z$  that classify the mating pairs;  $Z$  can be a  
167 composition of female trait  $X$ , e.g. preference, and male target  $Y$ , or can be any kind of  
168 different traits or alternatively the same trait in both sexes as size, age or color. In any  
169 case, we measure the mean change in  $Z$  caused by differences in  $m$ , as

$$170 \quad \Delta_m Z = \sum_{i,j} \Delta q_{ij} Z_{ij} = \sum_{ij} q_{ij} (m_{ij} - M) \frac{Z_{ij}}{M} = \frac{cov(Z,m)}{M} \quad (3)$$

171 Note that the covariance in (3) would also account for the expected genetic correlation,  
172 if any, between trait and preference in assortative mating cases (Lande, 1981). The  
173 covariance  $cov(m,Z)$  is the regression  $\beta(Z,m)$  multiplied by the variance  $V(m)$ . The  
174 variable  $Z$  can be any desired trait including, as we assumed above, the logarithm of the  
175 propensities. So, if we take again  $Z$  equal to the logarithm of  $m$ , then by substituting in  
176 (3) we obtain

$$177 \quad \Delta L = cov(m,l) / M = \beta(l,m)V(m) / M$$

178 remembering from (2) that  $\Delta L = J_{PTI}$  then  $V(m) / M = J_{PTI} / \beta(l,m)$  so that

179 
$$\Delta_m Z = \beta(Z, m) \frac{V(m)}{M} = \alpha_z J_{PTI}.$$

180 The term  $\alpha_z = \frac{\beta(Z, m)}{\beta(l, m)}$  changes the scale from mating propensity to phenotype.

181 From the point of view of the estimation with real data, if we cannot measure directly  
182 the values of  $m$  then we simply compute  $J$  based on trait  $Z$  and therefore we are really  
183 computing

184 
$$JZ_{PTI} = \alpha_z J_{PTI} \text{ so}$$

185 
$$\Delta_m Z = JZ_{PTI}$$

186 In this case, also note that the  $PTI$  coefficients are no longer the exact estimate of the  
187 mating propensities.

188 The distinction between  $JZ_{PTI}$  and  $J_{PTI}$  matters because when the information produced  
189 by mate choice is computed as  $JZ_{PTI}$ , a value of zero could mean that *i)*  $\alpha_z = 0$  i.e. the  
190 trait  $Z$  do not covariate with the differential propensities so that the mating is random  
191 with regard to  $Z$  or, alternatively *ii)*  $J_{PTI} = 0$  meaning that there is no differential mating  
192 propensity at all, i.e. the mating is random independently of the trait we focused on. In  
193 any other case, when  $JZ_{PTI} \neq 0$  it means that the non-random mating is correlated with  
194 the trait  $Z$  i.e.  $cov(m, Z) \neq 0$ .

195 If we have an estimate or a computable proxy for the propensity function  $m$  as for  
196 example, a measure of distance between female and male traits  $|D|$ , or a model with  
197 Gaussian functions (Carvajal-Rodriguez and Rolán-Alvarez, 2014) then the term  $\alpha_z$  can  
198 be separated from  $J_{PTI}$ . In this case we could obtain  $J_{PTI}$  by means of  $J(q', q)$  using the  
199 estimated mating propensities to classify the frequencies and we still can use the  
200 phenotypes  $Z$  and our proxy for  $m$  to compute  $\alpha_z$  as the ratio of the corresponding

201 regressions. In this way, we have kept apart the information  $J$  from the scaling  $\alpha$ . The  
202 product of information and scale gives  $\Delta_m Z$ .

203 Suppose that the estimate of  $J_{PTI}$  is different from zero while the scaling  $\alpha_z = 0$ , mate  
204 choice do exist but it is not linked with the phenotype  $Z$ . An interested researcher could  
205 compare different traits looking for the ones having the best scaling for the information  
206  $J_{PTI}$ . It seems that if we are able of having good proxies for mating propensity, this  
207 could pave the way for testing the impact of different traits on mate choice.

208 Additionally, we can still compute directly  $\Delta Z = Z' - Z$ , i.e. the difference in phenotype  
209 frequencies between observed and expected by random mating. Therefore we have two  
210 values,  $\Delta_m Z$  and  $\Delta Z$ , for the change in  $Z$ , the discrepancy between them gives an  
211 estimate of the change in  $Z$  caused by other factors than mating propensity (e.g.  
212 predators) so  $e_z = \Delta Z - \Delta_m Z$ .

213 Thus the total change in mean  $Z$  is

$$214 \quad \Delta Z = \alpha_z J_{PTI} + e_z$$

215 The mate choice mediated by the differences in mating propensity would produce a  
216 deviation from random mating. At the same time, this may cause two different effects,  
217 namely sexual isolation and, sexual selection.

218

## 219 **SEXUAL SELECTION**

220 Sexual selection is defined as the observed change in gene or phenotype frequencies in  
221 mated individuals with respect to total population frequencies (Rolán-Alvarez and  
222 Caballero, 2000). This change can be studied using the frequencies within each sex i.e.

223 intrasexual selection, or considering jointly the both sexes by using the pair sexual  
224 selection coefficient (*PSS*, Rolán-Alvarez and Caballero, 2000). I will show that when  
225 the *PSS* coefficients are aprioristically considered as the marginal propensities for the  
226 mating types, the information gained due to sexual selection is the sum of the  
227 information from each sex. When the focus is on the phenotypes, the above continue to  
228 be true provided that the same phenotypic scale is applied when computing *PSS* and the  
229 intrasexual components.

### 230 *Intrasexual selection*

231 From the general model, the population frequency of the female phenotype  $X_i$  is  $p_{1i}$ . The  
232 observed frequency of  $X_i$  in the matings,  $p'_{1i}$ , is computed as the sum of the frequencies  
233 of matings involving a female  $X_i$

$$234 \quad p'_{1i} = \sum_j^{males} q'_{ij} = p_{1i} \sum_j p_{2j} \frac{m_{ij}}{M} = p_{1i} \frac{m'_{fi}}{M}$$

235 where  $m'_{fi}$  is the marginal mating propensity for the female type  $i$ .

236 Similarly for males, the frequency of phenotype  $Y_j$  is  $p_{2j}$  and the frequency for the male  
237 type  $j$  is

$$238 \quad p'_{2j} = p_{2j} \frac{m'_{mj}}{M}$$

239 where  $m'_{mj}$  is the marginal mating propensity for the male type  $j$ .

240 The mean change in information due to sexual selection within each sex is, in terms of  
241 the female marginal propensity (female intrasexual selection)

$$242 \quad \Delta_m L_x = \sum_i^{females} \Delta p_{1i} X_i = \sum_{ij} p_i (m'_{fi} - M) \frac{X_i}{M} = J(p'_1, p_1) = J_{S1}$$

243 and, in terms of male marginal propensity (male intrasexual selection)

244 
$$\Delta_m L_y = \sum_j^{males} \Delta p_{2j} Y_j = J(p'_2, p_2) = J_{S2}$$

245 The term  $J_S$  has been obtained in a similar way as for the general case, i.e. by expressing  
 246 each marginal  $m'_{fi}$  and  $m'_{mj}$  in function of their respective ratio of frequencies multiplied  
 247 by the mean propensity  $M$  and substituting the phenotype  $X$  or  $Y$ , by the logarithm of the  
 248 corresponding (female or male) marginal  $m'$ .

249 The change to the scale of phenotypes produces

250 
$$\Delta_m \bar{X} = \frac{\beta_{xm}}{\beta_{tm}} J_{S1} = JX_{S1}$$

251 
$$\Delta_m \bar{Y} = \frac{\beta_{ym}}{\beta_{tm}} J_{S2} = JY_{S2}$$

252  $JX_{S1}$  and  $JY_{S2}$  are the Jeffrey's divergence that expresses the gain of information due to  
 253 intrasexual selection measured on the combined phenotypic scale  $Z$ .

254 *Pair sexual selection*

255 In addition to the computation within each sex, we can compare the expected pair types  
 256 under random mating calculated from mates with the expected pair types from total  
 257 numbers ( $PSS$ , see above). Thus,  $PSS_{ij} = (p'_{1i} p'_{2j}) / (p_{1i} p_{2j}) = m'_{fi} m'_{mj} / M^2$ . The latter term  
 258 can be viewed as an aprioristic expression of the  $PSS$  coefficients. Again, the difference  
 259 between the observed and the expected distribution can be expressed as

260 
$$\Delta_{PSS} L = \sum_{i,j} \Delta(p_{1i} p_{2j}) \log \left( \frac{p'_{1i} p'_{2j}}{p_{1i} p_{2j}} \right) = J(p'_1 p'_2, p_1 p_2) = J_{PSS},$$

261 where  $\Delta(p_{1i} p_{2j}) = p'_{1i} p'_{2j} - p_{1i} p_{2j}$ .

262 In the scale of phenotypes

263 
$$\Delta_{PSS} \bar{Z} = \frac{\beta_{zps}}{\beta_{tps}} J_{PSS} = JZ_{PSS}$$

264 The change in the phenotype due to sexual selection is driven by the aprioristic  
265 definition of  $PSS$  and is expressed in term of the information accumulated and rescaled  
266 from  $PSS$  to  $Z$ .

267 *Intrasexual selection and pair sexual selection*

268 The relationship between intrasexual selection and pair sexual selection measured by  
269  $PSS$  is, in terms of the information

$$270 \quad J_{PSS} = J_{S1} + J_{S2}$$

271 Recall that  $J_{PSS}$  is the sum of products  $\Delta(p_{1i}p_{2j}) \times \log((p'_{1i}p'_{2j}) / (p_{1i}p_{2j}))$ . Then note that

$$272 \quad \log((p'_{1i}p'_{2j}) / (p_{1i}p_{2j})) = \log(p'_{1i} / p_{1i}) + \log(p'_{2j} / p_{2j})$$

273 and that

$$274 \quad \sum_{ij} \Delta(p_{1i}p_{2j}) = \sum_{ij} (p'_{1i}p'_{2j} - p_{1i}p_{2j}) = \sum_i p'_{1i} \sum_j p'_{2j} - \sum_i p_{1i} \sum_j p_{2j} = 0$$

275 because each summatory is 1. Then, after some algebraic rearrangement we obtain

$$276 \quad J_{PSS} = \sum_{ij} \Delta(p_{1i}p_{2j}) \log((p'_{1i}p'_{2j}) / (p_{1i}p_{2j})) = \sum_i p'_{1i} \log(p'_{1i} / p_{1i}) - \sum_i p_{1i} \log(p'_{1i} / p_{1i}) + \\ 277 \quad \sum_j p'_{2j} \log(p'_{2j} / p_{2j}) - \sum_j p_{2j} \log(p'_{2j} / p_{2j}) = J_{S1} + J_{S2}.$$

278 And in the scale of phenotypes is

$$279 \quad JZ_{PSS} = JX_{S1} + JY_{S2} \quad (4)$$

280 provided that the same phenotypic scale applies in the pair sexual selection statistic and  
281 in the intrasexual components (i.e. the criteria utilized for classifying the different  
282 couples is the same).

283 The information captured in the  $PSS$  coefficients is the sum of the intrasexual selection  
284 within each sex.

285

286 **SEXUAL ISOLATION**

287 Sexual isolation is defined as the deviation from random mating in mated individuals  
 288 (Rolán-Alvarez and Caballero, 2000). The pair sexual isolation statistic (*PSI*) is the  
 289 number of observed pair types divided by the expected pair types from mates. In terms  
 290 of our model this is the ratio of frequencies

$$291 \quad \delta_{ij} = q'_{ij}/(p'_{1i}p'_{2j}) = (m_{ij}/M) / (m'_{\bar{i}}m'_{\bar{j}}/M^2) = PSI_{ij} \quad (5)$$

292 The term  $\delta$  refers to an aprioristic (depends on the  $m$ 's from the model) definition of the  
 293 *PSIs*. The joint isolation index for *PSI* can be expressed as

$$294 \quad I_{PSI} = \frac{(k-1) \sum_i \delta_{ii} - \sum_{i,j} \delta_{ij}}{(k-1) \sum_i \delta_{ii} + \sum_{i,j} \delta_{ij}}$$

295 where  $k$  is the number of phenotypic classes involved in the classification of the matings  
 296 (Carvajal-Rodriguez and Rolan-Alvarez, 2006).

297 As with the previous pairwise statistics we may obtain the equations of change between  
 298 observed and expected pair types in terms of  $J$ .

$$299 \quad \Delta_{PSI} L = \sum_{i,j} \Delta(p'_{1i}p'_{2j}) \log \left( \frac{q'_{ij}}{p'_{1i}p'_{2j}} \right) = J(q', p'_1 p'_2) = J_{PSI},$$

300 where  $\Delta(p'_{1i}p'_{2j}) = q'_{ij} - p'_{1i}p'_{2j}$ .

301 In the scale of phenotypes

$$302 \quad \Delta_{PSI} \bar{Z} = \frac{\beta_{z\delta}}{\beta_{l\delta}} J_{PSI} = JZ_{PSI}.$$

303 The  $JZ_{PSI}$  index provides the correct metric to express the part of change in mating  
 304 information that translates into sexual isolation. Presenting the *PSI*'s under this

305 formalism allow us to contemplate some facts that are not obvious from the a posteriori  
306 definition of coefficients estimated from data. We must realize (see equation 5) that if  
307 the propensity of each pair is the product of the marginal types of each partner then  $\delta =$   
308 1 and so, both the values of  $I_{PSI}$  and  $J_{PSI}$  are zero indicating no sexual isolation at all.  
309 Thus, in any model in which the mate propensity is multiplicative the only possible  
310 outcome from mate choice is intrasexual selection (see below).

311

### 312 *Relationship between Mate Choice, Sexual Selection and Sexual Isolation*

313 The information as captured by the *PTI* coefficients can be partitioned in terms of *PSS*  
314 and *PSI*. Recall the expression (2) for  $J_{PTI}$

$$315 \quad \Delta L = \sum_{i,j} \Delta q_{ij} \log \left( \frac{q'_{ij}}{q_{ij}} \right) = J(q', q) = J_{PTI}$$

316 The term  $\Delta q_{ij}$  can be expressed as the sum of the frequency changes for sexual selection  
317 and isolation

$$318 \quad \Delta q_{ij} = \Delta(p_{1i}p_{2j}) + \Delta(p'_{1i}p'_{2j})$$

319 The logarithmic term is also partitioned in the sexual selection and isolation  
320 components

$$321 \quad \log(PTI) = \log(PSS) + \log(PSI).$$

322 Therefore

$$323 \quad J_{PTI} = \sum_{ij} ([\Delta(p_{1i}p_{2j}) + \Delta(p'_{1i}p'_{2j})] \times [\log(PSS_{ij}) + \log(PSI_{ij})]) \text{ i.e.}$$

$$324 \quad J_{PTI} = J_{PSS} + J_{PSI} + E_0$$



325 where  $E_0 = \sum_{ij}(\Delta(p_{1i}p_{2j})\log(PSI_{ij}) + \Delta(p'_{1i}p'_{2j})\log(PSS_{ij}))$ . However, note that

326  $\Delta(p'_{1i}p'_{2j})\log(PSS_{ij}) = 0$  (see Appendix A) so

327 
$$E_0 = \sum_{ij}(\Delta(p_{1i}p_{2j})\log(PSI_{ij}))$$

328 that can also be expressed as

329 
$$E_0 = D'_{KL}(w, q' || p')$$

330 which is a Kullback–Leibler-like divergence with weights  $w_{ij} = (PSS_{ij} - 1) / PTI_{ij}$  in the

331 observations  $q'$ . Note that contrary to the standard K-L divergence,  $E_0$  can be negative

332 depending on the weights.

333 The total information is separated into the intrasexual selection,  $J_{PSS}$ , and isolation,  $J_{PSI}$ ,

334 components plus the mixed term  $E_0$ . Note that  $E_0$  appears only when both sexual

335 selection and sexual isolation effects occur.

336 If  $E_0 = 0$  this means that  $J_{PSS}$  and/or  $J_{PSI}$  capture the complete information from mate

337 choice. When  $E_0$  is positive it indicates that the information gathered from  $J_{PSS}$  and  $J_{PSI}$

338 is not the total information from mating choice. On the other side, when  $E_0$  is negative

339 there is some overlap between sexual selection and sexual isolation information.

340 In the scale of phenotypes the partition still holds provided that the same phenotypic

341 classification is applied when computing the different measures

342 
$$JZ_{PTI} = JZ_{PSS} + JZ_{PSI} + ZE_0 \quad (6)$$

343 where  $ZE_0$  is the value of  $E_0$  in the phenotypic scale.

344 For any given logarithmic base, the amount of the total information,  $JZ_{PTI}$ , will depend

345 on the magnitude of the differences among the population mating propensity values.

346 The higher the differences encountered in the propensities the higher the value of  $JZ_{PTI}$ .

347 Without loss of generality we consider the natural logarithm because this facilitates  
348 testing against the null hypothesis of no information by means of the chi-square  
349 distribution.

350 Provided that  $JZ_{PTI}$  is not zero, the relationships between the quantities in (6) can be  
351 resumed in three mating information statistics, the sexual isolation information ( $SII$ ) and  
352 sexual selection information ( $SSI$ ) measures

$$353 \quad SII = 100 \times JZ_{PSI} / JZ_{PTI} \quad (7-a)$$

$$354 \quad SSI = 100 \times JZ_{PSS} / JZ_{PTI} \quad (7-b)$$

355 These terms cannot be negative since they come in the form of the Jeffrey's divergence  
356 which is non-negative. An additional mixed term that can have negative values is the  
357 mixed sexual selection isolation information ( $MSSII$ )

$$358 \quad MSSII = 100 \times ZE_0 / JZ_{PTI} \quad (7-c)$$

359 These expressions measure the proportion of information that is obtained in terms of  
360 sexual isolation or intrasexual selection (recall from equation 4 that  $JZ_{PSS}$  is the sum of  
361 the intrasexual indexes) or the confounded effect of both.

362 If, as expected, the observations used to compute the information statistics come from  
363 the same sample, the sum in (6) is exact so that the statistics in (7) recover the whole  
364 information gathered from mate choice. On the contrary, if the computations has been  
365 performed using different samples, it could be a remaining part of mate choice  
366 information that is non-explained by the above statistics but that can be recovered by  
367 the error term

$$368 \quad E_{PTI} = 100 - (SII + SSI + MSSII) \quad (7-d)$$

369 that gives (in %) how much information may be lost due to differences in the  
 370 measurement of the involved phenotypes when computing from separate samples the  
 371 different information components.

372

### 373 *Real Data Application*

374 The mating model I have presented so far has been defined in a quite general way for  
 375 any number of male and female phenotypic classes and for any kind of mating  
 376 propensities. The application of the statistics *SII*, *SSI* and *MSSII* to a data sample of  
 377 dimorphic traits (two classes) is immediate. For clarity I will use the same model that  
 378 appears in the pairwise statistics original article (Rolán-Alvarez and Caballero, 2000).  
 379 Therefore, the two phenotypic types are noted as *A* and *B*, the total number of observed  
 380 matings is *t* and the number of type *A* females (*A'* in Rolán-Alvarez and Caballero,  
 381 2000) becomes, under our notation,  $p_{1A}n_1$ , and so *B'* is  $p_{1B}n_1$ ; the number of males *A*,  
 382 becomes  $p_{2A}n_2$  and males *B* are  $p_{2B}n_2$ . The observed absolute number for each pair (*i,j*)  
 383 would be  $q'_{ij}t$  with  $i,j \in \{A, B\}$  (see Table 1). The total number of expected copulating  
 384 pairs from population frequencies is  $n_1n_2$  corresponding to the quantity *S* in (Rolán-  
 385 Alvarez and Caballero, 2000).

386 **TABLE 1. The mating model for two phenotypic classes identified as types *A* and**  
 387 ***B*. The number of observed copulating pairs is *t*. The quantities in the cells**  
 388 **correspond to absolute numbers.**

|       |             |             |             |            |
|-------|-------------|-------------|-------------|------------|
|       | Females     |             |             |            |
|       |             | $p_{1A}n_1$ | $p_{1B}n_1$ |            |
| Males | $p_{2A}n_2$ | $q'_{AA}t$  | $q'_{BA}t$  | $p'_{2A}t$ |

$$\frac{p_{2B}n_2 \quad q'_{AB} t \quad q'_{BB} t \quad p'_{2B} t}{p'_{1A} t \quad p'_{1B} t}$$

389  $p_{ii}$ : observed relative frequency of type  $i \in \{A, B\}$  in population females ;  $n_1$ : number of females in the  
390 population;  $p_{2i}$ : observed relative frequency of type  $i \in \{A, B\}$  in population males ;  $n_2$ : number of males in  
391 the population;  $p'_{1i}$ : observed relative frequency of type  $i$  in mating females;  $p'_{2i}$ : observed relative  
392 frequency of type  $i$  in mating males;  $q'_{ij}$ : observed relative frequency of copulating pair  $i, j$ .

393

394 The data to be analyzed correspond to the same example utilized in (Rolán-Alvarez and  
395 Caballero, 2000) concerning a multiple-choice experiment involving two different lines  
396 of *Drosophila melanogaster* so called *M*-like and *Z*-like (Hollocher et al., 1997). Rolán-  
397 Alvarez & Caballero applied the pairwise statistics to this data and confirmed the  
398 previous results from Hollocher *et al* indicating stronger sexual isolation than sexual  
399 selection. They also suggested a fitness advantage of females versus males but were not  
400 able of distinguishing between female mate propensity (sexual selection) and male  
401 preference for *M* females.

402 To perform the analysis, we can express the observed data from that experiment in  
403 terms of the information model as presented in Table 1. In doing so and noting that the  
404 observed number of copulating pairs was  $t = 1704$  we obtain the necessary quantities in  
405 terms of our model (Table 2). By convenience, the computations in Table 2 and  
406 hereafter were performed using the natural logarithms.

407 The total mate choice information obtained in  $JZ_{PTI}$  is partitioned in 89% of sexual  
408 isolation ( $JZ_{PSI}=0.47$ ;  $I_{PSI} = 0.63$ ), 6% of sexual selection and 5% of mixed effects  
409 which explains the 100% of  $JZ_{PTI}$ . The information coming from sexual isolation is 14  
410 times the intrasexual information, result that matches pretty well the outcome in (Rolán-  
411 Alvarez and Caballero, 2000). The value of  $JZ_{PTI}$  multiplied by the number of matings

412 can be approximated by a chi-square variable with 3 degrees of freedom under the  
 413 expectation of  $JZ_{PTI} = 0$ , the  $p$ -value obtained is below 0.00001 which indicates non-  
 414 random mating. We may now test against the  $JZ_{PSI} = 0$  with 1 degree of freedom and the  
 415  $p$ -value is again below 0.00001. We may also test against  $JZ_{PSS} = 0$  which is also below  
 416 0.0001 and so it makes sense to test both the intrasexual female and male cases (with  
 417 one degree of freedom each). The  $p$ -value for the female case is below 0.0001 while is  
 418 0.77 in the males. Thus we detect significant sexual isolation and selection effects as  
 419 previously reported by (Rolán-Alvarez and Caballero, 2000). The sexual selection  
 420 component is caused by a significant intrasexual effect in females. The mixed term  $E_0$  is  
 421 positive thus indicating that not all the information is recovered by the  $PSS$  and  $PSI$   
 422 coefficients. This is due to the confounding effect which explains as far as the 5% from  
 423 the total information.

424

425 **TABLE 2. Analysis using the mate choice information model (Table 1 and**  
 426 **equations 7) on *D. melanogaster* mating data from (Hollocher et al., 1997). The**  
 427 **number of observed copulating pairs is  $t = 1704$ .**

|                           | Females Z            | Females M     |               |               |
|---------------------------|----------------------|---------------|---------------|---------------|
|                           |                      | 0.5 × 1440    | 0.5 × 1440    |               |
| Males Z                   | 0.5 × 1440           | 0.3585 × 1704 | 0.145 × 1704  | 0.5035 × 1704 |
| Males M                   | 0.5 × 1440           | 0.051 × 1704  | 0.4455 × 1704 | 0.4965 × 1704 |
|                           |                      | 0.4095 × 1704 | 0.5905 × 1704 |               |
| $JZ_{PTI}$                | 0.53                 |               |               |               |
| $SII (JZ_{PSI}, I_{PSI})$ | 89% (0.47, 0.63)     |               |               |               |
| $SSI (JX_{S1} + JY_{S2})$ | 6% (0.033 + 0.00005) |               |               |               |

|           |    |
|-----------|----|
| $MSSII$   | 5% |
| $E_{PTI}$ | 0% |

428 Number of females in the population:  $n_1 = 1440$ ; number of males in the population:  $n_2 = 1440$ ; From  
429 Table 1,  $p'_{ii}$ : observed relative frequency of type  $i$  in mating females;  $p'_{2i}$ : observed relative frequency of  
430 type  $i$  in mating males;  $q'_{ij}$ : observed relative frequency of copulating pair  $i, j$ .

431

### 432 *Relative Propensity Mate Choice Models*

433 In the analysis performed above we have used the information partition for testing if the  
434 observations can be explained from random mating. Since the expectation was  
435 computed using the population phenotypic frequencies this computation for each  
436 copulating pair corresponds to the  $PTI_{ij}$  statistics. Thus, each  $PTI_{ij}$  is an estimation of  
437 what we have called the mating propensity  $m_{ij}/M$  (see equation 1). The more correlated  
438 is the phenotype with the propensity the more precise would be the estimate.

439 The aprioristic modeling of mating propensity permits to interpret the deviations from  
440 random mating as caused by some intrinsic biological property among the copulating  
441 phenotypes. There are several ways in which these mating propensities or preferences  
442 can be modeled (Carvajal-Rodriguez and Rolán-Alvarez, 2014; Edward, 2015;  
443 Gavrillets, 2014). By studying the effect that different kind of functions may have on the  
444 observed mating distribution we would gain insight on the different mechanisms of  
445 mate choice and their consequences. In what follows we just take a brief look on some  
446 examples though a more in deep study on mating propensities is left for future work.

447 We consider a population with equal sex ratio and equal frequencies between  
448 phenotypes. The number of phenotypic classes was fixed to 3 just because this allow the

449 inspection of a MHC (major histocompatibility complex) population genetics choice  
 450 model (p. 195 Hedrick, 2005). The relative observed frequencies are the result of the  
 451 aprioristic definition of the corresponding mating propensity model. The different  
 452 assayed models are particular realizations of a generic model. The generic model  
 453 implies the composition  $\circ$  of the female acceptance (or preference) function  $f_1$  with the  
 454 male acceptance function  $f_2$ . For example,  $f_1(A',B) \circ f_2(B,A')$  involves the acceptance  
 455 function from female with phenotype  $A'$  for the male with phenotype  $B$  combined with  
 456 the acceptance from male  $B$  for the female  $A'$  (Table 3).

457 **TABLE 3. Mating propensity models. Values of  $m$  are already expressed relative to**  
 458 **the mean. The contribution of each phenotype to the specific models is noted by**  
 459 **lowercase.**

| $m_{\text{female,male}}$ | Additive | Multiplicative | Positive      | Negative      | MHC      | Generic                     |
|--------------------------|----------|----------------|---------------|---------------|----------|-----------------------------|
| $m_{A'A}$                | $a' + a$ | $a' \times a$  | $a' \times a$ | $10^{-17}$    | $1 - s$  | $f_1(A',A) \circ f_2(A,A')$ |
| $m_{A'B}$                | $a' + b$ | $a' \times b$  | $10^{-17}$    | $a' \times b$ | $1 - hs$ | $f_1(A',B) \circ f_2(B,A')$ |
| $m_{A'C}$                | $a' + c$ | $a' \times c$  | $10^{-17}$    | $a' \times c$ | 1        | $f_1(A',C) \circ f_2(C,A')$ |
| $m_{B'A}$                | $b' + a$ | $b' \times a$  | $10^{-17}$    | $b' \times a$ | $1 - s$  | $f_1(B',A) \circ f_2(A,B')$ |
| $m_{B'B}$                | $b' + b$ | $b' \times b$  | $b' \times b$ | $10^{-17}$    | $1 - s$  | $f_1(B',B) \circ f_2(B,B')$ |
| $m_{B'C}$                | $b' + c$ | $b' \times c$  | $10^{-17}$    | $b' \times c$ | $1 - s$  | $f_1(B',C) \circ f_2(C,B')$ |
| $m_{C'A}$                | $c' + a$ | $c' \times a$  | $10^{-17}$    | $c' \times a$ | 1        | $f_1(C',A) \circ f_2(A,C')$ |
| $m_{C'B}$                | $c' + b$ | $c' \times b$  | $10^{-17}$    | $c' \times b$ | $1 - hs$ | $f_1(C',B) \circ f_2(B,C')$ |
| $m_{C'C}$                | $c' + c$ | $c' \times c$  | $c' \times c$ | $10^{-17}$    | $1 - s$  | $f_1(C',C) \circ f_2(C,C')$ |

460 Positive: positive assortative mating. Negative: negative assortative mating. MHC: negative assortative  
 461 female mate choice model for MHC as defined in (Hedrick, 2005).

462

463 **ADDITIVE AND MULTIPLICATIVE MODELS**

464 In the additive model each phenotype adds its contributing effect to the value of  $m$ ,  
 465 similarly under the multiplicative model each phenotype contributes multiplicatively to  
 466  $m$ . In both kind of models the contribution of each phenotype does not depend on the  
 467 partner phenotype i.e. the contribution  $a'$  from female  $A'$  is the same when mating with  
 468 male  $A$  or  $B$ . Obviously, if the contribution of every phenotype is the same ( $a' = a = b'$   
 469  $= b = c' = c$ ) there is no deviation from random mating ( $JZ_{PTI} = 0$ ). The assayed  
 470 contributions were  $a'=a= 1$ ;  $b'=b=5$ ;  $c'=c=10$ .

471 When the model is additive, the occurrence of non-random mating is detected as a  
 472 composition of both intrasexual selection and sexual isolation (Table 4). Under the  
 473 effects considered most of the information comes from sexual selection equally  
 474 distributed in both sexes. These proportions change if other magnitudes of effects are  
 475 considered (not shown).

476 On the contrary, if the model is multiplicative the deviation from random mating only  
 477 produces intrasexual selection whatever the phenotypic effects. This happens because  
 478 under this model, the  $PSI$  coefficients are the product of the two marginal mating  
 479 propensities from the phenotypes in the copula.

480 **TABLE 4. Results in terms of mating information statistics for distinct mating**  
 481 **propensity models.**

|                | $JZ_{PTI}$ | $SII (I_{PSI})$ | $SSI (J_{S1}+J_{S2})$ | $MSSII$ | $E_{PTI}$ |
|----------------|------------|-----------------|-----------------------|---------|-----------|
| Additive       | 0.30       | 7% (-0.13)      | 83% (50% + 50%)       | 10%     | 0%        |
| Multiplicative | 1.28       | 0% (0)          | 100% (50% + 50%)      | 0%      | 0%        |



|                  |      |             |                 |      |    |
|------------------|------|-------------|-----------------|------|----|
| Positive         | 29.5 | 48% (1)     | 11% (50% + 50%) | 40%  | 0% |
| Negative         | 14.8 | 118% (-1)   | 4% (50% + 50%)  | -22% | 0% |
| MHC ( $h=0$ )    | 0.12 | 48% (-0.22) | 54% (82% + 18%) | -2%  | 0% |
| MHC ( $h=0.25$ ) | 0.10 | 57% (-0.2)  | 46% (93% + 7%)  | -3%  | 0% |
| MHC ( $h=0.5$ )  | 0.09 | 65% (-0.18) | 38% (100% + 0%) | -3%  | 0% |
| MHC ( $h=0.75$ ) | 0.09 | 71% (-0.15) | 34% (87% + 13%) | -5%  | 0% |
| MHC ( $h=1$ )    | 0.1  | 70% (-0.11) | 36% (50% +50%)  | -6%  | 0% |

482 Phenotypic effects from Table 3:  $a'=a=1$ ;  $b'=b=5$ ;  $c'=c=10$ . MCH:  $s=0.5$  from (Hedrick, 2005).  $E_{PTI}$ :  
 483 error due to scaling.

484

#### 485 ASSORTATIVE POSITIVE AND NEGATIVE MODELS

486 We have also defined two extreme assortative models with three different possible  
 487 mating types with asymmetric effects. The assortative positive model consists on  
 488 multiplicative effects except for the heterotypic crosses that have virtually 0 mating  
 489 acceptance (see Positive column in Table 3). From the total information recovered in  
 490  $J_{ZPTI}$ , 48% was due to isolation while 11% was intrasexual selection and another 41%  
 491 was due to confounding effects. As expected the value of  $I_{PSI}$  was 1 (Table 4).

492 The assortative negative model (see column noted as Negative in Table 3) is also a  
 493 multiplicative model except for the homotypic crosses that have virtually 0 mating  
 494 acceptance. The value of  $I_{PSI}$  was -1 which is not surprising but the percentage of 118%  
 495 linked to the isolation information index was somewhat striking. The highest value of  
 496 the statistic  $SII$  is indicating that the information recovered by the  $PSI$  and  $PSS$   
 497 coefficients is up biased by the confounding effect from marginal frequencies. The

498 excess obtained in the *SII* (+18) plus that in the *SSI* (+4) coefficients is recognized in the  
499 negative sign of the *MSSII* statistic (-22).

500 The observed bias is expected for the *PSI* coefficients when the mate choice is not  
501 symmetrical (Rolán-Alvarez and Caballero, 2000). We have seen that it requires both  
502 sexual isolation and selection effects detected. We have also seen that the sign will  
503 depend on the weights  $(PSS - 1)/PTI$ . In our case it disappears when we define equally  
504 weighted mating effects  $a' = a = b' = b = c' = c$  for the heterotypic crosses under the  
505 negative model; in this case the whole information is recovered by the sexual isolation  
506 component with null sexual selection and mixed components ( $SSI = MSSII = 0$ ).

507

508 *MHC-based negative assortative*

509 So far we have studied phenotypic models; however, the proposed framework can be  
510 applied to a general class of models including population genetic ones. Different models  
511 have been proposed to explain the maintenance of diversity in the major  
512 histocompatibility complex. One of the hypotheses suggests negative assortative mate  
513 choice for MHC. Thus, it is assumed that females preferentially mate males that differ  
514 genetically from themselves (p. 196 Hedrick, 2005). The model is defined for two  
515 alleles giving the genotypes  $A_1A_1$ ,  $A_1A_2$  and  $A_2A_2$  that under our notation become  $A'$ ,  $B'$   
516 and  $C'$  for females and  $A$ ,  $B$  and  $C$  for males. Therefore, we can express this model in  
517 terms of the information equations. The default selective and dominance coefficients  
518 were  $s = h = 0.5$  as suggested in (Hedrick, 2005). However a range of different selective  
519 and dominance coefficients were also checked.

520 The results for the different dominance coefficients are shown in Table 4. In any case,  
521 negative assortative mating is detected ( $I_{psi} \in [-0.11, -0.22]$ ) with the percentage of

522 information expressed as intersexual selection ( $SII$ ) increasing with the augment of the  
523 dominance effect. The maximum information  $JZ_{PTI}$  and the maximum isolation ( $I_{psi}$ ) do  
524 coincide with the case of  $h = 0$ . Note that this is not the situation having the maximum  
525 percentage on the  $SII$  statistic just because under the  $h = 0$  scenario is also when the  
526 highest female intrasexual selection occurs. In addition, the intrasexual partition also  
527 varies with  $h$ ; under codominance ( $h = 0.5$ ) the full intrasexual component is due to  
528 females while under absolute dominance ( $h = 1$ ) it is equally partitioned between both  
529 sexes. The outcome of varying  $s$  (not shown) is equivalent to varying the effects  
530 between phenotypes. Small  $s$  implies less information but also lower confounding  
531 effect. Higher  $s$  increases the information jointly with the confounding effect.

532 From Table 4 it seems that when negative assortative mating occurs due to asymmetric  
533 effects, the  $I_{PSI}$  and the mixed term signs coincide and in fact both types of values  
534 correlated well ( $r = 0.95$ ).

535 Finally, it should be noted that the error term  $E_{PTI}$  has always been 0 indicating that the  
536 partition of the total mate choice information was exact as expected because we have  
537 used the same phenotypic classification when computing all the indexes.

538

## 539 **FEMALE PREFERENCE AND MALE DISPLAY MODELS**

540 So far we have considered examples with the same trait in female and male. However,  
541 there are several situations where the female preference is for a male display trait  
542 (Pomiankowski and Iwasa, 1998). In this case the female trait is the exerted preference  
543 and the male trait is the target phenotype. In the preference-display context, the traits  
544 involved are different between sexes so that the crosses cannot be classified in  
545 homotypic versus heterotypic so preventing the calculation of  $I_{PSI}$  and other similar

546 indices. Our mating propensity model can easily capture this type of situation to express  
 547 the components of mate choice in terms of information. This is an improvement with  
 548 respect to other sexual isolation indexes that by requiring a classification in homotypic  
 549 versus heterotypic mates, are only applicable to mating models in which the female and  
 550 male phenotype is the same (similarity/dissimilarity models).

551 In Table 5 we appreciate three examples of such preference-display models. There are  
 552 two types of females which have preference for males displaying phenotypic values  $A$ ,  
 553  $B$  or  $C$ . The mating propensities have been defined with only three possible values,  
 554 namely  $a = 1$ ,  $a/2$  or virtually 0 ( $10^{-17}$ ). In the first column the female preference  
 555 generates a situation of complete isolation; in the second column the resultant effect of  
 556 the female preference is of full intrasexual selection in males and the third column  
 557 corresponds to a mixed scenario were both sexual selection and isolation occur with a  
 558 mixed effect of -24%. Thus, again we appreciate that when both sexual selection and  
 559 strong sexual isolation (negative) appear, the sign of the mixed term indicates the  
 560 direction of the isolation.

561 **TABLE 5. Mating propensity models of female preference for male display traits.**  
 562 **Two types of females ‘0’ or ‘1’ might have different preferences for males**  
 563 **presenting distinct values for some secondary trait ( $a = 1$ ,  $a/2$  or  $10^{-17}$ ). Only the**  
 564 **females choose so that the generic model implies only the female acceptance (or**  
 565 **preference) function  $f_1$ .**

| $m_{\text{female} \rightarrow \text{male}}$ | Isolation | Sexual selection | Mixed      | Generic    |
|---------------------------------------------|-----------|------------------|------------|------------|
| $m_{0A}$                                    | $a$       | $a$              | $a$        | $f_1(0,A)$ |
| $m_{0B}$                                    | $a/2$     | $a/2$            | $10^{-17}$ | $f_1(0,B)$ |

|                         |            |                  |                 |            |
|-------------------------|------------|------------------|-----------------|------------|
| $m_{0C}$                | $10^{-17}$ | $10^{-17}$       | $10^{-17}$      | $f_1(0,C)$ |
| $m_{1A}$                | $10^{-17}$ | a                | $10^{-17}$      | $f_1(1,A)$ |
| $m_{1B}$                | a/2        | a/2              | $10^{-17}$      | $f_1(1,B)$ |
| $m_{1C}$                | a          | $10^{-17}$       | a               | $f_1(1,C)$ |
| $JZ_{PTI}$              | 13         | 13               | 26              |            |
| $SII$                   | 100%       | 0%               | 75%             |            |
| $SSI (JX_{S1}+JY_{S2})$ | 0%         | 100% (0% + 100%) | 49% (0% + 100%) |            |
| $MSSII$                 | 0%         | 0%               | -24%            |            |

---

566

567

## 568 *Discussion*

569 The mate choice model defined in (1) is valid for phenotypes and genotypes and only  
570 requires the abstract representation of any kind of relative mating propensity. At the  
571 same time, (1) is analogous to the Wright's selection equation for the change in gene  
572 frequencies so, from the point of view of that analogy, the relative propensity would  
573 play the role of fitness referred to each mating couple. By defining the relationship  
574 between observed and expected mating frequencies as a function of relative mating  
575 propensity, the choice is expressed as a potentiality which is also a key characteristic of  
576 fitness (Wagner, 2010).

577 As with the fitness concept, the mate propensity faces two main aspects, namely the  
578 measurement of differences between couples, and the intrinsic causes that provokes the  
579 propensity values. In this work by expressing the equation of change in terms of the  
580 choice information and its components I have focused in the first aspect.

581 I have connected the cause of mating choice, modeled by the abstract concept of  
582 propensity, with the different possible outcomes. Notably, the connection between mate  
583 choice and its consequences appears in terms of information. The general equation  
584 represents the information gained by mate choice with respect to random mating. This  
585 general information is the sum of the information due to sexual isolation and sexual  
586 selection plus a mixed effect term that can be computed separately from the others and  
587 measures the adjustment of the partition components with respect to the total mate  
588 choice information. In addition, the information from sexual selection is the sum of the  
589 male and female intrasexual selection information.

590 Although the model has been constructed assuming discrete phenotypes it is possible to  
591 estimate the Kullback-Leibler divergence for the continuous case (Pérez-Cruz, 2008)  
592 in order to apply a similar mate choice information partition for quantitative traits. This  
593 has been left for future work.

594 The information framework also provides a baseline for defining adequate null  
595 hypotheses for the distinct aspects of the mate choice problem. In fact, the information  
596 terms are mean log-likelihood ratios so we can apply them for contrasting the different  
597 null hypothesis about random mating, sexual selection and isolation.

598 We can perform the test against random mating by considering a chi-square distribution  
599 with  $KK'-1$  degrees of freedom (Evren and Tuna, 2012; Sokal and Rohlf, 1981), where  
600  $K \times K'$  is the number of different mating categories. The intrasexual selection  
601 components correspond to  $K-1$  and  $K'-1$  degrees of freedom for  $K$  female and  $K'$  male  
602 traits respectively. And the sexual isolation component corresponds to  $(K-1)(K'-1)$   
603 degrees of freedom. Of course, we may also use randomization tests if we prefer to rely  
604 on the empirical distribution approach.

605 Therefore, if we want to contrast mate choice for a given trait  $Z$  we test deviations from  
606 zero information in  $JZ_{PTI}$  and its components. However, if we want to contrast mate  
607 choice in general, we must test deviations from zero information in  $J_{PTI}$  which should be  
608 the same that testing a flat preference function across all trait values (Edward, 2015).

609 We have also gained some intuition about the effects of choice by defining different  
610 preference models and studying the information outcome. In doing so, we have seen  
611 that multiplicative effects of the phenotype onto the mating propensity function do not  
612 generate any kind of intersexual selection. Thus, sexual isolation can be viewed as a  
613 deviation from multiplicativity in the phenotypic or trait effects over mate choice.

614 Interestingly, the preference-display models are also easily interpreted in terms of  
615 information and we have been able of inspecting models of full isolation, full  
616 intrasexual selection and mixed effect models.

617 We have also seen that the asymmetry in the phenotypic effects can bias the information  
618 within the intra- and intersexual components provoking overrated  $PSI$  and/or  $PSS$   
619 information that becomes exposed by the negative values in the mixed component from  
620 the total information partition. In other cases, the asymmetry provokes that the  
621 information recovered in the intra- and intersexual components is less than the total  
622 mate choice information. The bias disappears when the effects are symmetric. The total  
623 mate choice information is not affected in any case.

624 In addition to the phenotypic models already commented we have also analyzed a  
625 population genetic model of mate choice for MHC. Although the support for MHC-  
626 based negative assortative mating is contentious (Hedrick, 2005), the model suffices for  
627 showing the application of the choice information framework in the context of  
628 population genetics. To convert the model to our framework we simply needed to

629 consider each genotype as a type and the mating preference in the original model as a  
630 relative propensity that depends on the selective and dominance coefficients (see  
631 Hedrick, 2005). The original model just try to represent female negative assortative  
632 mating by favoring matings in which the males shares less alleles with the female  
633 partner. Because the mating preferences are built from the side of the female  
634 convenience (less shared alleles with the male partner) there is a priori no male  
635 intrasexual selection in the model. However, intrasexual selection emerges as an effect  
636 in one or both sexes depending on the dominance coefficient. These different outcomes  
637 simply occur because changing  $h$  is equivalent to change the relative mating propensity  
638 relationships among the different couples.

639 To conclude, it is worth mention that the concept of mate choice is important in the  
640 evolutionary theory and other disciplines. It has been approached from a diversity of  
641 fields and inference methodologies, which has provoked that the terminology has not  
642 always been very precise. This may have contributed to some confusion in terms of  
643 causes and effects jointly with plenty discussion (Ah-King and Gowaty, 2016; Edward,  
644 2015; Janicke et al., 2016; Roughgarden et al., 2015).

645 Here, I have shown that the mean change in the mating phenotypes can be expressed as  
646 the information gained due to mate choice. Overall, the obtained results lead to the  
647 suggestion that the information interpretation of mate choice is an interesting avenue  
648 that may help to improve the study of the causes as well as the effects of this important  
649 evolutionary phenomenon.

650

## **APPENDIX A**

651 *Proposition 1*



652 
$$\sum_{ij} \Delta(p'_{1i} p'_{2j}) \log(PSS_{ij}) = 0$$

653 then

654 
$$E_0 = \sum_{ij} (\Delta(p_{1i} p_{2j}) \log(PSS_{ij}) + \Delta(p'_{1i} p'_{2j}) \log(PSS_{ij})) = \sum_{ij} \Delta(p_{1i} p_{2j}) \log(PSS_{ij}).$$

655 First, recall that

656 
$$\sum_{ij} \Delta(p'_{1i} p'_{2j}) \log(PSS_{ij}) = \sum_{ij} (q'_{ij} - p'_{1i} p'_{2j}) \log(PSS_{ij})$$

657 and also that by definition of *PSS*

658 
$$\log(PSS_{ij}) = \log((p'_{1i} p'_{2j}) / (p_{1i} p_{2j}))$$

659 that can be expressed as

660 
$$\log(PSS_{ij}) = \log(p'_{1i} / p_{1i}) + \log(p'_{2j} / p_{2j})$$

661 then by simple substitution and rearranging the terms

662 
$$\sum_{ij} \Delta(p'_{1i} p'_{2j}) \log(PSS_{ij}) =$$

663 
$$\sum_{ij} (q'_{ij} - p'_{1i} p'_{2j}) \log(PSS_{ij}) = \sum_{ij} q'_{ij} \log(p'_{1i} / p_{1i}) + \sum_{ij} q'_{ij} \log(p'_{2j} / p_{2j}) -$$

664 
$$\sum_{ij} (p'_{1i} p'_{2j}) \log(p'_{1i} / p_{1i}) - \sum_{ij} (p'_{1i} p'_{2j}) \log(p'_{2j} / p_{2j})$$

665 Now recall that the *i* subscript refers to females and subscript *j* to males, then the double

666 summatory is the sum through females and males, thus by reminding that  $\sum_j p'_{2j} = \sum_i p'_{1i}$

667 = 1 we note that

668 
$$\sum_{ij} (p'_{1i} p'_{2j}) \log(p'_{1i} / p_{1i}) = \sum_i (p'_{1i}) \log(p'_{1i} / p_{1i}) \sum_j p'_{2j} = \sum_i p'_{1i} \log(p'_{1i} / p_{1i})$$

669 and similarly

670 
$$\sum_{ij} (p'_{1i} p'_{2j}) \log(p'_{2j} / p_{2j}) = \sum_j p'_{2j} \log(p'_{2j} / p_{2j})$$

671 so we have

672 
$$\sum_{ij} \Delta(p'_{1i} p'_{2j}) \log(PSS_{ij}) =$$

673 
$$\sum_{ij} q'_{ij} \log(p'_{1i}/p_{1i}) + \sum_{ij} q'_{ij} \log(p'_{2j}/p_{2j}) - \sum_i p'_{1i} \log(p'_{1i}/p_{1i}) - \sum_j p'_{2j} \log(p'_{2j}/p_{2j})$$

674 Now note that

675 
$$\sum_{ij} q'_{ij} \log(p'_{1i}/p_{1i}) = \sum_i \log(p'_{1i}/p_{1i}) \sum_j q'_{ij}$$

676 and that for each female  $i$  the sum through males of the observed mating frequencies

677 involving female  $i$  is, by definition,  $p'_{1i}$  i.e.  $\sum_j q'_{ij} = p'_{1i}$  and similarly for each male  $j$  we

678 have  $\sum_i q'_{ij} = p'_{2j}$ . Then

679 
$$\sum_{ij} q'_{ij} \log(p'_{1i}/p_{1i}) = \sum_i \log(p'_{1i}/p_{1i}) p'_{1i}$$

680 and

681 
$$\sum_{ij} q'_{ij} \log(p'_{2j}/p_{2j}) = \sum_j \log(p'_{2j}/p_{2j}) p'_{2j}$$

682 therefore

683 
$$\sum_{ij} \Delta(p'_{1i} p'_{2j}) \log(PSS_{ij}) =$$

684 
$$\sum_i \log(p'_{1i}/p_{1i}) p'_{1i} - \sum_i p'_{1i} \log(p'_{1i}/p_{1i}) + \sum_j \log(p'_{2j}/p_{2j}) p'_{2j} - \sum_j p'_{2j} \log(p'_{2j}/p_{2j}) = 0$$

685 and so the proposition is true

686 
$$E_0 = \sum_{ij} (\Delta(p_{1i} p_{2j}) \log(PSI_{ij}))$$

687

688 *Proposition 2*

689 
$$E_0 = D'_{KL}(w, q \| p')$$

690 where

691  $p' = p'_{1i}p'_{2j}$

692  $w_{ij} = (PSS_{ij} - 1) / PTI_{ij}$

693  $D'_{KL}(w, q' || p') = \sum_{ij} w_{ij} q'_{ij} \log(q'_{ij} / (p'_{1i}p'_{2j}))$

694 From the model (1) and the partitions (4) and (5) in the main text we know that

695  $(p_{1i}p_{2j}) = (p'_{1i}p'_{2j}) / PSS_{ij}$

696  $(p'_{1i}p'_{2j}) = q'_{ij} / PSI_{ij}$

697 therefore

698  $\Delta(p_{1i}p_{2j}) = (p'_{1i}p'_{2j}) - (p_{1i}p_{2j}) = (q'_{ij} / PSI_{ij}) - (q'_{ij} / PTI_{ij}) = q'_{ij}[(1 / PSI_{ij}) - (1 / PTI_{ij})]$

699 and since  $PTI_{ij} = PSI_{ij} \times PSS_{ij}$  we obtain

700  $\Delta(p_{1i}p_{2j}) = q'_{ij}(PSS_{ij} - 1) / PTI_{ij}$

701 and so

702  $E_0 = \sum_{ij} (\Delta(p_{1i}p_{2j}) \log(PSI_{ij})) = \sum_{ij} w_{ij} q'_{ij} \log(PSI_{ij}) = D'_{KL}(w, q' || p')$

703 which is Kullback–Leibler-like divergence with weights  $w_{ij}$  in the observations  $q'$ .

704

## ACKNOWLEDGEMENT

This work was supported by Xunta de Galicia (Grupo de Referencia Competitiva, ED431C2016-037), Ministerio de Economía y Competitividad (BFU2013-44635-P and CGL2016-75482-P) and by Fondos FEDER (“Unha maneira de facer Europa”).

## LITERATURE CITED

- Ah-King, M., Gowaty, P. A., 2016. A conceptual review of mate choice: stochastic demography, within-sex phenotypic plasticity, and individual flexibility. *Ecology and Evolution* 6, 4607-4642.
- Bergstrom, C. T., Real, L. A., 2000. Toward a theory of mutual mate choice: Lessons from two-sided matching. *Evolutionary Ecology Research*, 493-508.
- Carvajal-Rodriguez, A., Rolan-Alvarez, E., 2006. JMATING: a software for the analysis of sexual selection and sexual isolation effects from mating frequency data. *BMC Evol Biol* 6, 40.
- Carvajal-Rodriguez, A., Rolán-Alvarez, E., 2014. A comparative study of Gaussian mating preference functions: a key element of sympatric speciation models. *Biological Journal of the Linnean Society* 113, 642-657.
- Dall, S. R. X., Giraldeau, L.-A., Olsson, O., McNamara, J. M., Stephens, D. W., 2005. Information and its use by animals in evolutionary ecology. *Trends in Ecology & Evolution* 20, 187-193.
- Darwin, C., 1871. *The descent of man, and selection in relation to sex*. Murray.
- Edward, D. A., 2015. The description of mate choice. *Behavioral Ecology* 26, 301-310, doi:10.1093/beheco/aru142.
- Evren, A., Tuna, E., 2012. On some properties of goodness of fit measures based on statistical entropy. *International Journal of Research and Reviews in Applied Sciences* 13, 192-205.
- Frank, S. A., 2009. Natural selection maximizes Fisher information. *J Evol Biol* 22, 231-44.
- Frank, S. A., 2012. Natural selection. V. How to read the fundamental equations of evolutionary change in terms of information theory. *J Evol Biol* 25, 2377-96.
- Frank, S. A., 2013. Natural selection. VI. Partitioning the information in fitness and characters by path analysis. *Journal of Evolutionary Biology* 26, 457-471.
- Gavrilets, S., 2004. *Fitness landscapes and the origin of species*. Princeton University Press, Princeton, N.J.
- Gavrilets, S., 2014. *Is Sexual Conflict an "Engine of Speciation"?* Cold Spring Harbor Perspectives in Biology 6.
- Hedrick, P. W., 2005. *Genetics of Populations*. Jones & Bartlett Publishers, Boston.
- Hollocher, H., Ting, C.-T., Pollack, F., Chung, I. W., 1997. Incipient Speciation by Sexual Isolation in *Drosophila melanogaster*: Variation in Mating Preference and Correlation Between Sexes. *Evolution* 51, 1175-1181.
- Hughes, A. L., 2015. Sexual Selection and Mate Choice: Insights from Neutralist Perspectives. *Evolutionary Biology* 42, 366-378, doi:10.1007/s11692-015-9315-x.
- Janicke, T., Häderer, I. K., Lajeunesse, M. J., Anthes, N., 2016. Darwinian sex roles confirmed across the animal kingdom. *Science Advances* 2, doi:10.1126/sciadv.1500983.
- Kirkpatrick, M., 1982. Sexual selection and the evolution of female choice. *Evolution*, 1-12.
- Kuijper, B., Pen, I., Weissing, F. J., 2012. A guide to sexual selection theory. *Annual Review of Ecology, Evolution, and Systematics* 43, 287-311.
- Lande, R., 1981. Models of speciation by sexual selection on polygenic traits. *Proceedings National Academy of Sciences, USA* 78, 3721-3725.
- Pérez-Cruz, F., 2008. Kullback-Leibler divergence estimation of continuous distributions. 2008 IEEE international symposium on information theory. IEEE, pp. 1666-1670.
- Pomiankowski, A., Iwasa, Y., 1998. Runaway ornament diversity caused by Fisherian sexual selection. *Proceedings of the National Academy of Sciences of the United States of America* 95, 5106-5111.
- Prum, R. O., 2010. The Lande-Kirkpatrick mechanism is the null model of evolution by intersexual selection: implications for meaning, honesty, and design in intersexual signals. *Evolution* 64, 3085-3100.

- Roff, D. A., 2015. The evolution of mate choice: a dialogue between theory and experiment. *Annals of the New York Academy of Sciences* 1360, 1-15.
- Roff, D. A., Fairbairn, D. J., 2014. The evolution of phenotypes and genetic parameters under preferential mating. *Ecology and Evolution* 4, 2759-2776.
- Rolán-Alvarez, E., Caballero, A., 2000. Estimating sexual selection and sexual isolation effects from mating frequencies. *Evolution* 54, 30-6.
- Roughgarden, J., Adkins-Regan, E., Akçay, E., Crawford, J., Gadagkar, R., Griffith, S., Hinde, C., Hoquet, T., O'Connor, C., Prokop, Z., Prum, R., Shafir, S., Snow, S., Taylor, R. D., Van Cleve, J., Weisberg, M., 2015. Sexual selection studies: a NESCent catalyst meeting. *PeerJ PrePrints* 3:e680v3.
- Sokal, R. R., Rohlf, F. J., 1981. *Biometry*. W. H. Freeman and Co., New York.
- Wagner, G. P., 2010. The measurement theory of fitness. *Evolution* 64, 1358-1376.
